# Supplementary material
Source: PubMed Central journal article supplement (PMC3128458)
Supplement: mmc2.pdf [file mmc2.pdf]

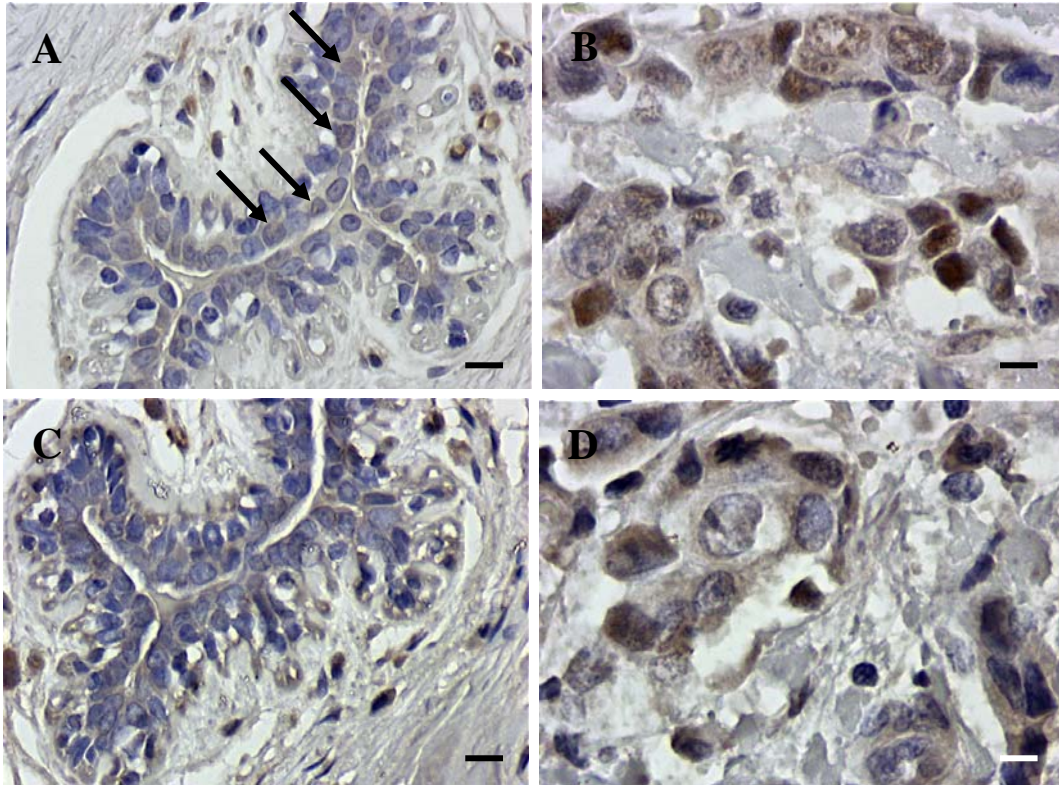

### Supplementary Figure 2

#### Comparison of two TRIM24/TIF-1 $\alpha$ antibodies.

Normal breast duct (A, C) and infiltrating duct carcinoma (B, D) sections were processed with a microwave oven treatment before immunolabeling with the TS1 (1/3000) (A, B) or (H-190, 1/100) (C, D) antibodies (x63 - Scale bars = 10  $\mu$ m).
