# Supplementary material
Source: PubMed Central journal article supplement (PMC3128458)
Supplement: mmc3.pdf [file mmc3.pdf]

**Supplementary Table 1: Patients and tumors characteristics by database**

|                                         | <b>Fan <i>et al.</i></b> |                  | <b>CBA2 Tissue Array</b> |                |
|-----------------------------------------|--------------------------|------------------|--------------------------|----------------|
|                                         | <b>No.</b>               | <b>(%)</b>       | <b>No.</b>               | <b>(%)</b>     |
| <b>TRIM24,</b><br><i>median (range)</i> | <i>1.0</i>               | <i>(0.8;1.3)</i> | <i>30</i>                | <i>(0;200)</i> |
| <b>N</b>                                |                          |                  |                          |                |
| N0                                      | 119                      | 50               | 12                       | 32.4           |
| N+                                      | 119                      | 50               | 25                       | 67.6           |
| <b>T</b>                                |                          |                  |                          |                |
| T1 ( $\leq 2$ cm)                       | 122                      | 51.3             | -                        | -              |
| T2-T3-T4 ( $> 2$ cm)                    | 116                      | 48.7             |                          |                |
| <b>Histology</b>                        |                          |                  |                          |                |
| IDC (Ductal)                            | -                        | -                | 28                       | 75.7           |
| IDCM                                    | -                        | -                | 7                        | 18.9           |
| DCIS                                    | -                        | -                | 2                        | 5.4            |
| <b>ER</b>                               |                          |                  |                          |                |
| ER-                                     | 58                       | 24.4             | 16                       | 43.2           |
| ER+                                     | 180                      | 75.6             | 21                       | 56.8           |
| <b>PR</b>                               |                          |                  |                          |                |
| PR-                                     | -                        | -                | 20                       | 55.6           |
| PR+                                     | -                        | -                | 16                       | 44.4           |
| <i>Missing</i>                          |                          |                  | <i>1</i>                 |                |
| <b>p53</b>                              |                          |                  |                          |                |
| WT                                      | -                        | -                | 21                       | 56.8           |
| Mut                                     |                          |                  | 16                       | 43.2           |
| <b>Grade SBR</b>                        |                          |                  |                          |                |
| I                                       | 57                       | 24.0             | 5                        | 14.3           |
| II                                      | 86                       | 36.1             | 17                       | 48.6           |
| III                                     | 95                       | 39.9             | 13                       | 37.1           |
| <i>Missing</i>                          |                          |                  | <i>2</i>                 |                |
| <b>Type / Sorlie</b>                    |                          |                  |                          |                |
| Normal Like                             | 24                       | 10.1             |                          |                |
| Luminal A                               | 100                      | 42.0             |                          |                |
| Luminal B                               | 41                       | 17.2             | -                        | -              |
| ErbB2                                   | 30                       | 12.6             |                          |                |
| Basal                                   | 43                       | 18.1             |                          |                |
| <b>Vital status</b>                     |                          |                  |                          |                |
| Alive                                   | 169                      | 71.0             | 18                       | 58.1           |
| Dead                                    | 69                       | 29.0             | 13                       | 41.9           |
| <i>Missing</i>                          |                          |                  | <i>6</i>                 |                |
| <b>Relapse</b>                          |                          |                  |                          |                |
| No                                      | 136                      | 57.1             | -                        | -              |
| Yes                                     | 102                      | 42.9             |                          |                |
