# Supplementary material
Source: PubMed Central journal article supplement (PMC3128458)
Supplement: mmc4.pdf [file mmc4.pdf]

**Supplementary Table 2: Univariate analysis in the 238 tumors set from Fan *et al.***

|                       | TRIM24 mRNA levels |              |        |
|-----------------------|--------------------|--------------|--------|
|                       | HR                 | 95%CI        | P*     |
| <b>TRIM24</b>         |                    |              |        |
| ≤ 1.08                | 1                  |              | <0.001 |
| > 1.08                | 2.68               | [1.5 ; 4.8]  |        |
| <b>N</b>              |                    |              |        |
| N0                    | 1                  |              | 0.414  |
| N+                    | 0.82               | [0.5 ; 1.3]  |        |
| <b>T</b>              |                    |              |        |
| T1 (≤2 cm)            | 1                  |              | 0.003  |
| T2-T3-T4 (>2cm)       | 2.1                | [1.3 ; 3.4]  |        |
| <b>ER</b>             |                    |              |        |
| ER-                   | 1                  |              | <0.001 |
| ER+                   | 0.3                | [0.2 ; 0.5]  |        |
| <b>Grade SBR</b>      |                    |              |        |
| I                     | 1                  |              | <0.001 |
| II                    | 4.9                | [1.5 ; 16]   |        |
| III                   | 12.1               | [3.7 ; 38.9] |        |
| <b>Type / Sorlie</b>  |                    |              |        |
| Normal Like           | 1                  |              | <0.001 |
| Luminal A             | 0.64               | [0.2 ; 1.8]  |        |
| Luminal B             | 2.39               | [0.9 ; 6.5]  |        |
| ErbB2                 | 2.65               | [0.9 ; 7.5]  |        |
| Basal                 | 3.52               | [1.3 ; 9.3]  |        |
| <b>70-gene</b>        |                    |              |        |
| Good                  | 1                  |              | <0.001 |
| Poor                  | 10.8               | [4.3 ; 27]   |        |
| <b>Two-gene ratio</b> |                    |              |        |
| High                  | 1                  |              | 0.028  |
| Low                   | 0.57               | [0.3 ; 0.9]  |        |
| <b>Wound response</b> |                    |              |        |
| Activated             | 1                  |              | <0.001 |
| Quiescent             | 0.19               | [0.07 ; 0.5] |        |
| <b>Recurrence</b>     |                    |              |        |
| High                  | 1                  |              | <0.001 |
| Intermediate          | 0.27               | [0.1 ; 0.7]  |        |
| Low                   | 0.06               | [0.01 ; 0.2] |        |

\* Logrank test
